# Supplementary material for: Contribution of primary care expansion to Sustainable Development Goal 3 for health: a microsimulation of the 15 largest cities in Brazil
Source: HighWire-hosted journal article supplement (doi:10.1136/bmjopen-2021-049251), 2022-01-01

## **Supporting Information**

**Supporting Information Table 1:** Hazard ratios for death by cause group, subdivided by sex, race/ethnicity, and whether or not the family receives Bolsa Familia (BF) benefits.

| Cause                             | Subgroup   | Hazard Ratio | Lower 95% Confidence interval | Upper 95% Confidence interval |
|-----------------------------------|------------|--------------|-------------------------------|-------------------------------|
| All Causes                        | Males      | 0.68         | 0.64                          | 0.71                          |
| All Causes                        | Females    | 0.49         | 0.47                          | 0.52                          |
| All Causes                        | Race White | 0.60         | 0.56                          | 0.64                          |
| All Causes                        | Race Black | 0.50         | 0.47                          | 0.54                          |
| All Causes                        | Race Pardo | 0.57         | 0.54                          | 0.60                          |
| All Causes                        | No Bf      | 0.64         | 0.61                          | 0.67                          |
| All Causes                        | Bf         | 0.52         | 0.49                          | 0.54                          |
| Infectious And Parasitic Diseases | Males      | 0.82         | 0.62                          | 1.08                          |
| Infectious And Parasitic Diseases | Females    | 0.53         | 0.41                          | 0.67                          |
| Infectious And Parasitic Diseases | Race White | 0.86         | 0.63                          | 1.17                          |
| Infectious And Parasitic Diseases | Race Black | 0.68         | 0.45                          | 1.02                          |
| Infectious And Parasitic Diseases | Race Pardo | 0.52         | 0.39                          | 0.69                          |
| Infectious And Parasitic Diseases | No Bf      | 0.68         | 0.52                          | 0.88                          |
| Infectious And Parasitic Diseases | Bf         | 0.63         | 0.49                          | 0.82                          |
| Hiv/Aids                          | Males      | 1.15         | 0.88                          | 1.52                          |
| Hiv/Aids                          | Females    | 0.68         | 0.55                          | 0.83                          |
| Hiv/Aids                          | Race White | 0.67         | 0.44                          | 1.01                          |
| Hiv/Aids                          | Race Black | 0.69         | 0.51                          | 0.93                          |
| Hiv/Aids                          | Race Pardo | 1.02         | 0.80                          | 1.31                          |
| Hiv/Aids                          | No Bf      | 1.20         | 0.86                          | 1.68                          |
| Hiv/Aids                          | Bf         | 0.73         | 0.61                          | 0.89                          |

|                                 |            |      |      |      |
|---------------------------------|------------|------|------|------|
| Tuberculosis, Malaria, And Ntds | Males      | 0.91 | 0.61 | 1.35 |
| Tuberculosis, Malaria, And Ntds | Females    | 0.24 | 0.13 | 0.43 |
| Tuberculosis, Malaria, And Ntds | Race White | 0.61 | 0.29 | 1.28 |
| Tuberculosis, Malaria, And Ntds | Race Black | 0.49 | 0.25 | 0.95 |
| Tuberculosis, Malaria, And Ntds | Race Pardo | 0.67 | 0.42 | 1.06 |
| Tuberculosis, Malaria, And Ntds | No Bf      | 0.68 | 0.38 | 1.22 |
| Tuberculosis, Malaria, And Ntds | Bf         | 0.56 | 0.38 | 0.82 |
| Maternal Causes (Females Only)  | Females    | 0.97 | 0.60 | 1.56 |
| Maternal Causes (Females Only)  | Race White | 1.01 | 0.46 | 2.23 |
| Maternal Causes (Females Only)  | Race Black | 1.09 | 0.46 | 2.56 |
| Maternal Causes (Females Only)  | Race Pardo | 0.82 | 0.37 | 1.82 |
| Maternal Causes (Females Only)  | No Bf      | 1.93 | 0.63 | 5.90 |
| Maternal Causes (Females Only)  | Bf         | 0.81 | 0.48 | 1.39 |
| Nutritional Deficiencies        | Males      | 0.59 | 0.26 | 1.33 |
| Nutritional Deficiencies        | Females    | 0.52 | 0.28 | 0.98 |
| Nutritional Deficiencies        | Race White | 0.21 | 0.05 | 0.97 |
| Nutritional Deficiencies        | Race Black | 0.40 | 0.14 | 1.19 |
| Nutritional Deficiencies        | Race Pardo | 0.92 | 0.50 | 1.69 |
| Nutritional Deficiencies        | No Bf      | 0.99 | 0.53 | 1.88 |
| Nutritional Deficiencies        | Bf         | 0.23 | 0.10 | 0.54 |
| Diseases Of The Nervous System  | Males      | 0.52 | 0.28 | 0.98 |
| Diseases Of The Nervous System  | Females    | 0.58 | 0.38 | 0.91 |
| Diseases Of The Nervous System  | Race White | 0.46 | 0.25 | 0.88 |

|                                    |            |      |      |      |
|------------------------------------|------------|------|------|------|
| Diseases Of The Nervous System     | Race Black | 0.83 | 0.40 | 1.75 |
| Diseases Of The Nervous System     | Race Pardo | 0.55 | 0.31 | 0.97 |
| Diseases Of The Nervous System     | No Bf      | 0.48 | 0.29 | 0.82 |
| Diseases Of The Nervous System     | Bf         | 0.68 | 0.41 | 1.12 |
| Endocrine Disorders                | Males      | 0.74 | 0.57 | 0.95 |
| Endocrine Disorders                | Females    | 0.50 | 0.41 | 0.61 |
| Endocrine Disorders                | Race White | 0.58 | 0.43 | 0.79 |
| Endocrine Disorders                | Race Black | 0.55 | 0.40 | 0.74 |
| Endocrine Disorders                | Race Pardo | 0.60 | 0.47 | 0.76 |
| Endocrine Disorders                | No Bf      | 0.59 | 0.47 | 0.75 |
| Endocrine Disorders                | Bf         | 0.59 | 0.47 | 0.73 |
| Mental And Substance Use Disorders | Males      | 0.66 | 0.41 | 1.05 |
| Mental And Substance Use Disorders | Females    | 0.27 | 0.15 | 0.50 |
| Mental And Substance Use Disorders | Race White | 0.67 | 0.32 | 1.41 |
| Mental And Substance Use Disorders | Race Black | 0.17 | 0.05 | 0.56 |
| Mental And Substance Use Disorders | Race Pardo | 0.53 | 0.32 | 0.86 |
| Mental And Substance Use Disorders | No Bf      | 0.75 | 0.36 | 1.54 |
| Mental And Substance Use Disorders | Bf         | 0.40 | 0.26 | 0.61 |
| Stroke                             | Males      | 0.77 | 0.63 | 0.94 |
| Stroke                             | Females    | 0.45 | 0.38 | 0.53 |
| Stroke                             | Race White | 0.67 | 0.53 | 0.85 |
| Stroke                             | Race Black | 0.45 | 0.34 | 0.58 |
| Stroke                             | Race Pardo | 0.60 | 0.50 | 0.73 |

|                               |            |      |      |      |
|-------------------------------|------------|------|------|------|
| Stroke                        | No Bf      | 0.65 | 0.54 | 0.78 |
| Stroke                        | Bf         | 0.50 | 0.42 | 0.60 |
| Heart Disease                 | Males      | 0.59 | 0.52 | 0.67 |
| Heart Disease                 | Females    | 0.41 | 0.37 | 0.46 |
| Heart Disease                 | Race White | 0.47 | 0.40 | 0.56 |
| Heart Disease                 | Race Black | 0.43 | 0.35 | 0.52 |
| Heart Disease                 | Race Pardo | 0.51 | 0.44 | 0.58 |
| Heart Disease                 | No Bf      | 0.52 | 0.46 | 0.59 |
| Heart Disease                 | Bf         | 0.47 | 0.42 | 0.54 |
| Other Cardiovascular Diseases | Males      | 0.68 | 0.54 | 0.86 |
| Other Cardiovascular Diseases | Females    | 0.49 | 0.41 | 0.60 |
| Other Cardiovascular Diseases | Race White | 0.63 | 0.47 | 0.84 |
| Other Cardiovascular Diseases | Race Black | 0.41 | 0.30 | 0.56 |
| Other Cardiovascular Diseases | Race Pardo | 0.65 | 0.52 | 0.81 |
| Other Cardiovascular Diseases | No Bf      | 0.64 | 0.52 | 0.79 |
| Other Cardiovascular Diseases | Bf         | 0.50 | 0.40 | 0.62 |
| Digestive Diseases            | Males      | 0.67 | 0.53 | 0.84 |
| Digestive Diseases            | Females    | 0.52 | 0.41 | 0.66 |
| Digestive Diseases            | Race White | 0.61 | 0.46 | 0.83 |
| Digestive Diseases            | Race Black | 0.47 | 0.32 | 0.70 |
| Digestive Diseases            | Race Pardo | 0.61 | 0.48 | 0.79 |
| Digestive Diseases            | No Bf      | 0.61 | 0.47 | 0.79 |
| Digestive Diseases            | Bf         | 0.59 | 0.48 | 0.74 |
| Genitourinary Diseases        | Males      | 0.67 | 0.51 | 0.88 |

|                        |            |      |      |      |
|------------------------|------------|------|------|------|
| Genitourinary Diseases | Females    | 0.52 | 0.42 | 0.65 |
| Genitourinary Diseases | Race White | 0.63 | 0.46 | 0.87 |
| Genitourinary Diseases | Race Black | 0.60 | 0.43 | 0.83 |
| Genitourinary Diseases | Race Pardo | 0.57 | 0.44 | 0.74 |
| Genitourinary Diseases | No Bf      | 0.64 | 0.51 | 0.80 |
| Genitourinary Diseases | Bf         | 0.52 | 0.40 | 0.68 |
| Unintentional Injuries | Males      | 0.56 | 0.43 | 0.74 |
| Unintentional Injuries | Females    | 0.43 | 0.32 | 0.58 |
| Unintentional Injuries | Race White | 0.50 | 0.33 | 0.76 |
| Unintentional Injuries | Race Black | 0.47 | 0.31 | 0.71 |
| Unintentional Injuries | Race Pardo | 0.53 | 0.40 | 0.71 |
| Unintentional Injuries | No Bf      | 0.55 | 0.40 | 0.78 |
| Unintentional Injuries | Bf         | 0.46 | 0.36 | 0.60 |
| Intentional Injuries   | Males      | 0.42 | 0.33 | 0.53 |
| Intentional Injuries   | Females    | 0.30 | 0.18 | 0.50 |
| Intentional Injuries   | Race White | 0.51 | 0.33 | 0.79 |
| Intentional Injuries   | Race Black | 0.45 | 0.27 | 0.73 |
| Intentional Injuries   | Race Pardo | 0.34 | 0.24 | 0.46 |
| Intentional Injuries   | No Bf      | 0.72 | 0.51 | 1.01 |
| Intentional Injuries   | Bf         | 0.28 | 0.21 | 0.37 |
| Neoplasms              | Males      | 0.97 | 0.86 | 1.11 |
| Neoplasms              | Females    | 0.61 | 0.55 | 0.68 |
| Neoplasms              | Race White | 0.68 | 0.59 | 0.78 |
| Neoplasms              | Race Black | 0.69 | 0.57 | 0.84 |
| Neoplasms              | Race Pardo | 0.83 | 0.74 | 0.93 |

|                                     |            |      |      |      |
|-------------------------------------|------------|------|------|------|
| Neoplasms                           | No Bf      | 0.77 | 0.69 | 0.86 |
| Neoplasms                           | Bf         | 0.73 | 0.65 | 0.82 |
| Respiratory Infections And Diseases | Males      | 0.84 | 0.73 | 0.98 |
| Respiratory Infections And Diseases | Females    | 0.49 | 0.42 | 0.56 |
| Respiratory Infections And Diseases | Race White | 0.73 | 0.62 | 0.87 |
| Respiratory Infections And Diseases | Race Black | 0.57 | 0.44 | 0.72 |
| Respiratory Infections And Diseases | Race Pardo | 0.58 | 0.49 | 0.69 |
| Respiratory Infections And Diseases | No Bf      | 0.68 | 0.59 | 0.79 |
| Respiratory Infections And Diseases | Bf         | 0.61 | 0.52 | 0.70 |

**Supporting Information Table 2:** (A) 95% lower confidence interval estimates and (B) 95% upper confidence interval estimates around the relative impact on cause-specific mortality given changes in the percentage point coverage in the FHS program (Estratégia de Saúde da Família) primary care program. The cells show the ratio of mortality by cause under different levels of FHS coverage, compared to the current mortality rate (at 0% change in FHS coverage), the reference column.



(A)

| Percentage point change in FHS coverage:      | Ratio of mortality by cause, compared to current mortality rate (at 0%) |      |      |      |      |      |      |
|-----------------------------------------------|-------------------------------------------------------------------------|------|------|------|------|------|------|
|                                               | -20%                                                                    | -10% | 0%   | 10%  | 20%  | 30%  | 40%  |
| All causes                                    | 1.07                                                                    | 1.00 | 0.93 | 0.86 | 0.79 | 0.72 | 0.65 |
| Infections (excluding HIV, TB, malaria, NTDs) | 1.07                                                                    | 1.00 | 0.93 | 0.86 | 0.79 | 0.72 | 0.66 |
| HIV                                           | 1.04                                                                    | 0.99 | 0.93 | 0.88 | 0.82 | 0.76 | 0.70 |
| TB, malaria, NTDs                             | 1.00                                                                    | 0.97 | 0.93 | 0.90 | 0.86 | 0.82 | 0.78 |
| Respiratory                                   | 1.06                                                                    | 1.00 | 0.93 | 0.87 | 0.80 | 0.73 | 0.67 |
| Nutrition                                     | 1.05                                                                    | 0.99 | 0.93 | 0.87 | 0.81 | 0.75 | 0.69 |
| Neoplasms                                     | 1.07                                                                    | 1.00 | 0.93 | 0.86 | 0.79 | 0.72 | 0.65 |
| Nervous system                                | 1.02                                                                    | 0.98 | 0.93 | 0.89 | 0.84 | 0.79 | 0.74 |
| Endocrine                                     | 1.07                                                                    | 1.00 | 0.93 | 0.86 | 0.79 | 0.72 | 0.65 |
| Mental/substance use                          | 1.07                                                                    | 1.00 | 0.93 | 0.86 | 0.80 | 0.73 | 0.66 |
| Stroke                                        | 1.10                                                                    | 1.01 | 0.93 | 0.85 | 0.77 | 0.69 | 0.61 |
| Heart disease                                 | 1.07                                                                    | 1.00 | 0.93 | 0.86 | 0.80 | 0.73 | 0.66 |
| Other cardiovascular                          | 1.09                                                                    | 1.01 | 0.93 | 0.85 | 0.77 | 0.70 | 0.62 |
| Digestive                                     | 1.07                                                                    | 1.00 | 0.93 | 0.86 | 0.80 | 0.73 | 0.66 |
| Genitourinary                                 | 1.06                                                                    | 1.00 | 0.93 | 0.87 | 0.80 | 0.74 | 0.67 |
| Unintentional injuries                        | 1.09                                                                    | 1.01 | 0.93 | 0.85 | 0.77 | 0.69 | 0.62 |
| Intentional injuries                          | 1.13                                                                    | 1.03 | 0.93 | 0.84 | 0.74 | 0.65 | 0.56 |
| Maternal                                      | 0.97                                                                    | 0.95 | 0.93 | 0.91 | 0.88 | 0.85 | 0.82 |

(B)

|                                               | Ratio of mortality by cause, compared to current mortality rate (at 0%) |      |      |      |      |      |      |
|-----------------------------------------------|-------------------------------------------------------------------------|------|------|------|------|------|------|
| Percentage point change in FHS coverage:      | -20%                                                                    | -10% | 0%   | 10%  | 20%  | 30%  | 40%  |
| All causes                                    | 1.15                                                                    | 1.11 | 1.07 | 1.03 | 0.99 | 0.95 | 0.91 |
| Infections (excluding HIV, TB, malaria, NTDs) | 1.14                                                                    | 1.11 | 1.07 | 1.03 | 0.99 | 0.96 | 0.92 |
| HIV                                           | 1.11                                                                    | 1.09 | 1.07 | 1.05 | 1.02 | 1.00 | 0.98 |
| TB, malaria, NTDs                             | 1.07                                                                    | 1.07 | 1.07 | 1.07 | 1.08 | 1.08 | 1.09 |
| Respiratory                                   | 1.14                                                                    | 1.10 | 1.07 | 1.03 | 1.00 | 0.97 | 0.94 |
| Nutrition                                     | 1.12                                                                    | 1.09 | 1.07 | 1.04 | 1.02 | 0.99 | 0.97 |
| Neoplasms                                     | 1.14                                                                    | 1.11 | 1.07 | 1.03 | 0.99 | 0.95 | 0.91 |
| Nervous system                                | 1.09                                                                    | 1.08 | 1.07 | 1.06 | 1.05 | 1.04 | 1.04 |
| Endocrine                                     | 1.14                                                                    | 1.11 | 1.07 | 1.03 | 0.99 | 0.96 | 0.92 |
| Mental/substance use                          | 1.14                                                                    | 1.10 | 1.07 | 1.03 | 1.00 | 0.96 | 0.93 |
| Stroke                                        | 1.17                                                                    | 1.12 | 1.07 | 1.02 | 0.96 | 0.91 | 0.85 |
| Heart disease                                 | 1.14                                                                    | 1.11 | 1.07 | 1.03 | 0.99 | 0.96 | 0.92 |
| Other cardiovascular                          | 1.17                                                                    | 1.12 | 1.07 | 1.02 | 0.97 | 0.92 | 0.86 |
| Digestive                                     | 1.14                                                                    | 1.10 | 1.07 | 1.03 | 1.00 | 0.96 | 0.92 |
| Genitourinary                                 | 1.13                                                                    | 1.10 | 1.07 | 1.04 | 1.00 | 0.97 | 0.94 |
| Unintentional injuries                        | 1.17                                                                    | 1.12 | 1.07 | 1.02 | 0.97 | 0.92 | 0.86 |
| Intentional injuries                          | 1.20                                                                    | 1.14 | 1.07 | 1.00 | 0.93 | 0.86 | 0.78 |
| Maternal                                      | 1.04                                                                    | 1.05 | 1.07 | 1.09 | 1.10 | 1.13 | 1.15 |

**Supporting Information Figure 1:** Hazard ratios for FHS users (compared to non-users) by cause of death.

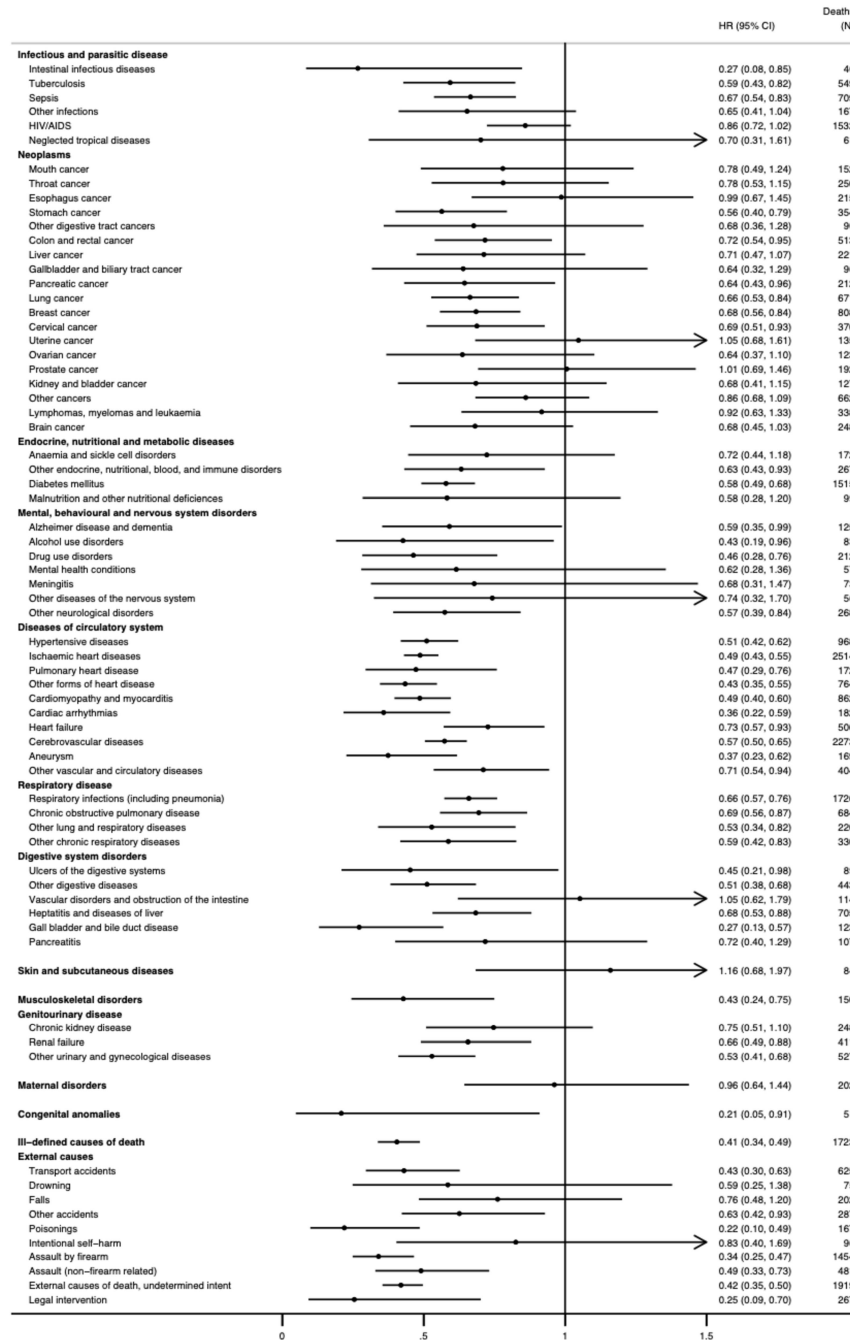

**Supporting Information Figure 2:** Uncertainty estimates around mean projected variations in (A) all-cause crude mortality, (B) all-cause age-standardized mortality, (C) infant mortality and (D) under-5 mortality given different levels of Family Health Strategy (FHS) program primary care coverage. See Table 1 for current coverage levels corresponding to a 0% change on the x-axis. Mean values are population-weighted across all 15 Brazilian cities.

(A)

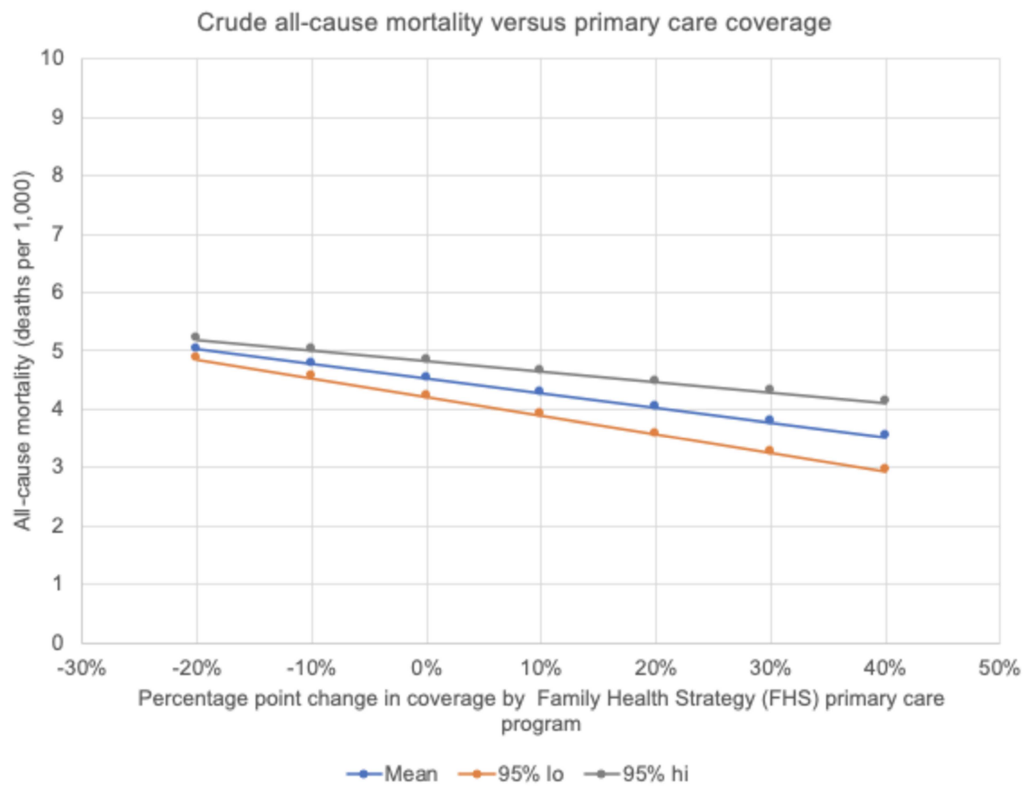

(B)

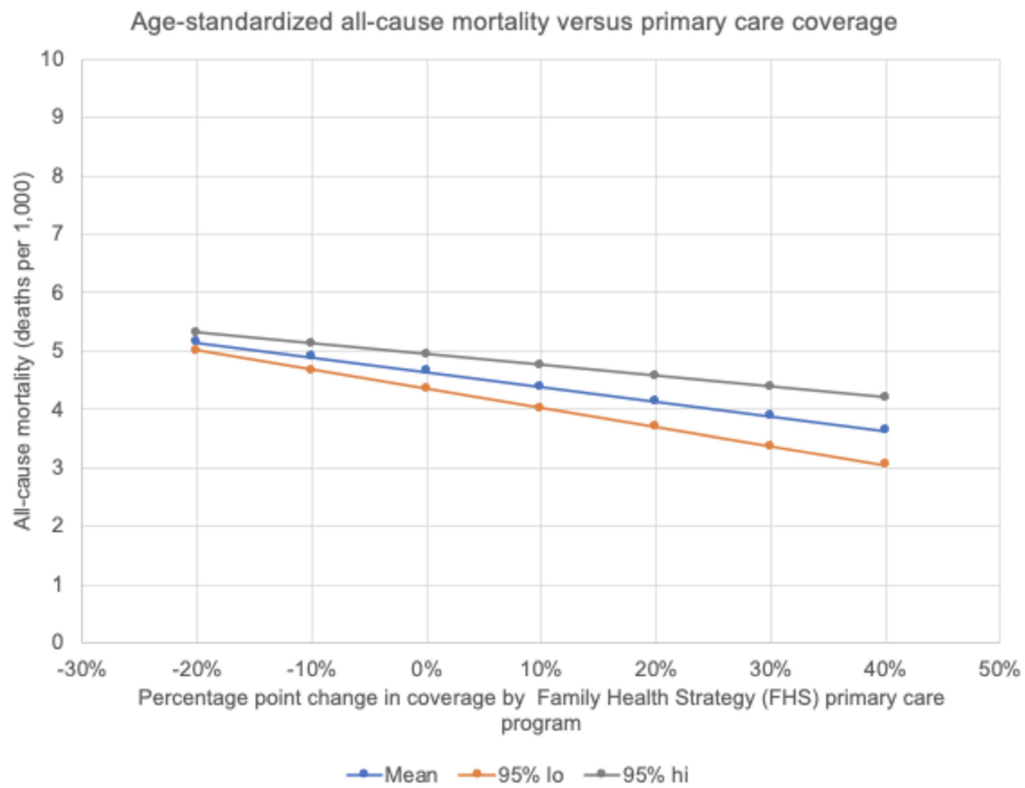

(C)

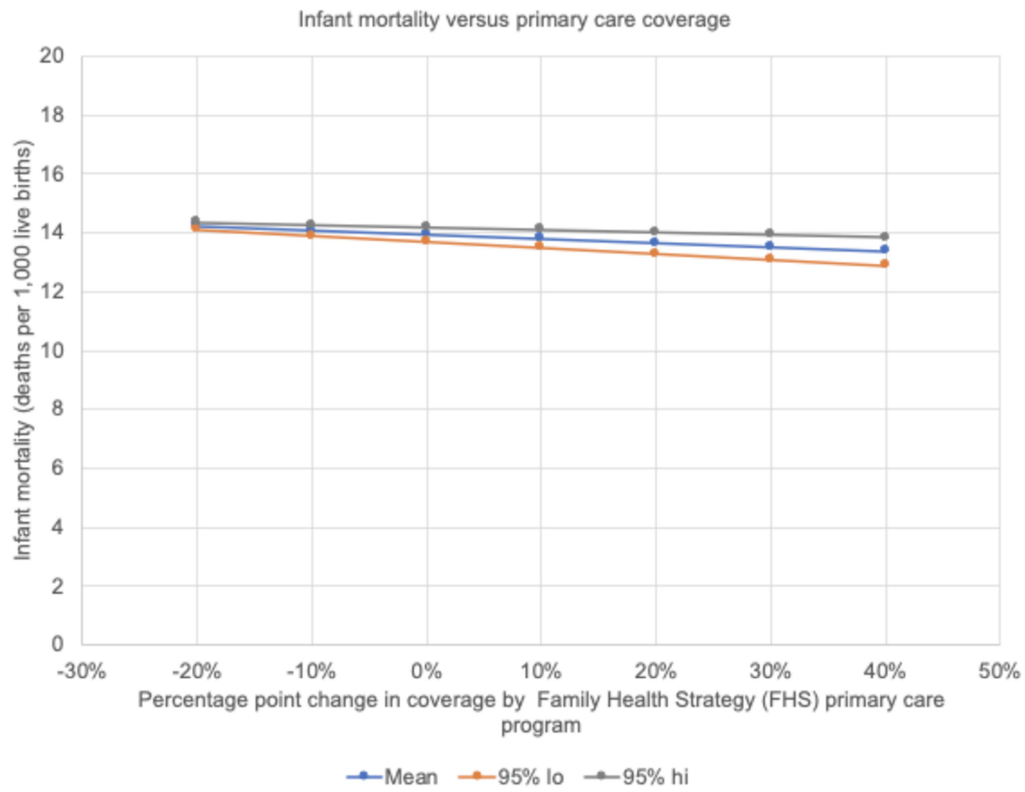

(D)

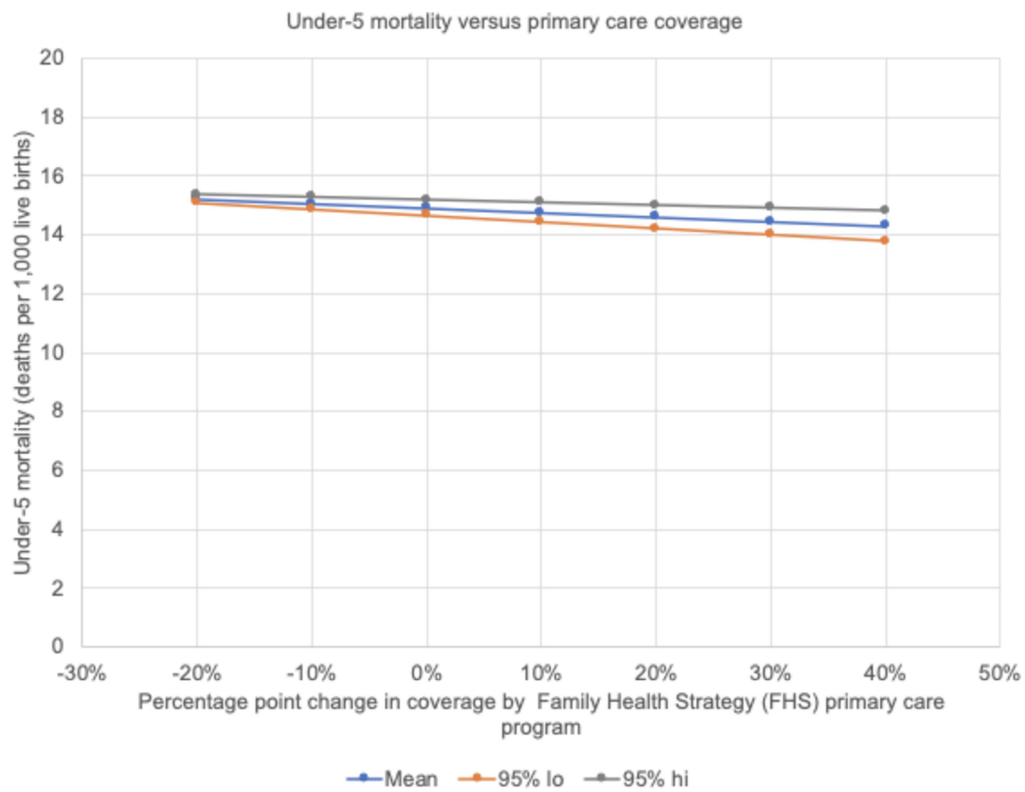

Supplement: bmjopen-2021-049251supp001_data_supplement.pdf [file bmjopen-2021-049251supp001_data_supplement.pdf]
